2

26 build layout paths by selecting edges, ranked by a likelihood function that is calculated from the  
27 inferred distributions of features on a subset of safe edges. For diploid samples, we integrated a  
28 reimplementaion of the ReFHap algorithm to perform molecular phasing. The phasing  
29 procedure is used to remove edges connecting reads assigned to different haplotypes and to  
30 obtain a phased assembly by running the layout algorithm on the filtered graph. We ran the  
31 implemented algorithms on PacBio HiFi and Nanopore sequencing data taken from bacteria,  
32 yeast, *Drosophila*, rice, maize, and human samples. Our algorithms showed competitive  
33 efficiency and contiguity of assemblies, as well as superior accuracy in some cases, as  
34 compared to other currently used software. We expect that this new development will be useful  
35 for researchers building genome assemblies for different species.

36

37 Keywords: genome assembly, bioinformatics, software, algorithms, haplotype phasing

38

## 39 **INTRODUCTION**

40 Contiguous and accurate assembly of complex eukaryotic genomes is one of the most  
41 challenging tasks in current biotechnology and bioinformatics (Baker M 2012, Nurk et al. 2022).  
42 Bioinformatic tools for genome assembly are used to sort and orient partial reads produced by  
43 various sequencing technologies. Partial genome assemblies, including most gene-rich regions,  
44 have been generated in the last decade. However contiguous and high-quality assemblies are  
45 required to integrate synteny information in genome-scale comparative genomics and  
46 pangenomics, to study evolution and dynamics of mobile elements, for population genomic  
47 analysis, such as genome-wide association studies (GWAS), and for the discovery of genomic  
48 footprints of selection (Amiri et al. 2018, Xu et al. 2020). High-quality assemblies are also useful  
49 to understand the genome evolution of species (Hu et al. 2021), to identify structural variations  
50 (Ouzhuluobu et al. 2020), and to define the gene repertoire including targets for resistance in

51 plants and animals, as well as virulence factors and effectors in pathogens (Bhadauria et al.  
52 2019). This complete gene catalog is key for identifying interesting genomic target regions for  
53 plant and animal breeding (Low et al. 2020, Song et al. 2021), and personalized medicine.  
54 Moreover, genome assemblies have been useful in pathogen surveillance for public health  
55 (Taylor et al. 2019).

56 The production of sequencing data has grown exponentially in the last years and genome  
57 assembly has become a routinary task; however most of the currently available genomes have  
58 been sequenced using high-quality short-read technologies such as Illumina. Currently, long-  
59 read technologies, such as PacBio and Nanopore, have improved the quality of data and  
60 allowed a better de novo assembly of genomes, haplotype phasing, and structural variants  
61 identification (Hon et al. 2020). Nanopore sequencing technologies offer the advantage of  
62 producing the longest read lengths (Mbp range), the more common lengths being 10 to 30 Kb,  
63 as these are limited by the quality and size of the DNA delivered to the sequencing pore  
64 (Amarasinghe et al. 2020). Furthermore, some of the Nanopore sequencers can be portable  
65 and generate data in real time, proving useful for field research and diagnostics (Xu and Seki  
66 2019). In contrast, PacBio single molecule real-time (SMRT) sequencing delivers reads of 30 Kb  
67 on average, it has a low coverage bias across different values of G+C content, and allows for  
68 the direct detection of DNA base modifications (Nakano et al. 2017). Nanopore and PacBio CLR  
69 long-reads have an average error rate of ~15%. Nevertheless, PacBio has developed a new  
70 method to generate HiFi reads (high-fidelity reads with an average error rate of ~0.5%), which  
71 allow the assembly of complete chromosomes , even for diploid or polyploid organisms. Despite  
72 the high assembly contiguity achieved with long reads, other strategies can be used to improve  
73 assemblies, such as: Hi-C (Zhou et al. 2019), parental information (Wenger et al. 2019), and  
74 Strand-seq (Hills et al. 2021).

75 Most of the commonly used tools to assemble long-read datasets implement the overlap-layout-  
76 consensus (OLC) algorithm. These were developed to assemble reads with high error rates,

4

77 such as the Nanopore and PacBio CLR reads. Canu (Koren et al. 2017) uses a MinHash  
78 overlapping strategy (Berlin et al. 2015) with a tf-idf weighting to identify overlaps. Then, a linear  
79 graph is constructed using a greedy best-overlap algorithm. WTDBG (Ruan and Li 2019)  
80 implements minimizers for efficient identification of overlaps. Flye (Kolmogorov et al. 2019)  
81 implements an algorithm to resolve repeats from a possibly inaccurate initial assembly.  
82 FALCON (Chin et al. 2016) implements a simple haplotype phasing algorithm to perform read  
83 clustering and to generate phased assemblies. After the emergence of PacBio HiFi reads, new  
84 algorithms have been developed to perform error correction. These algorithms aim for perfect  
85 reads in which single nucleotide differences can be used to resolve differences between  
86 repetitive elements (Nurk et al. 2020, Cheng et al. 2021). HiCanu is an improvement of Canu  
87 that implements homopolymer compression to align and correct reads having base counts on  
88 homopolymer tracts as main source of error (Nurk et al. 2020). HiFiASM integrates haplotype  
89 phasing to perform haplotype aware error correction (Cheng et al. 2021). Error correction of  
90 long reads, especially Nanopore reads, remains an important step during genome assembly  
91 and is usually a computationally expensive process. NECAT was developed as an error  
92 corrector and de novo assembler for Nanopore reads (Chen et al. 2021). In NECAT error  
93 correction is based on a two-step progressive method by which low-error-rate subsequences of  
94 reads are corrected first, and then they are used to correct high-error-rate subsequences.

95 In this work we introduce a new software implementation for genome assembly from long-read  
96 sequencing data. It includes new algorithmic approaches to build overlap-layout-consensus  
97 (OLC) assembly graphs, and to identify layout paths. Benchmark experiments on PacBio HiFi  
98 and Nanopore data from organisms of different species including *Escherichia coli*, yeast,  
99 *Drosophila melanogaster*, rice, maize, and human show that our algorithms are competitive and,  
100 in some cases, more accurate, compared to previous solutions. These algorithms are  
101 implemented as part of the Next Generation Sequencing Experience Platform (NGSEP) (Tello  
102 et al. 2019), allowing a tight integration with genome comparison and detection of genomic

5

103 variants within a single easy-to-use tool for analysis of both short and long read DNA  
104 sequencing data.

105

## 106 **RESULTS**

### 107 **K-mer count based hashing for efficient and accurate construction of assembly** 108 **graphs**

109 We implemented a new hashing scheme for minimizers to efficiently identify overlaps and build  
110 OLC graphs. Figure 1 shows the implemented algorithm to build an overlap graph and a layout.  
111 The graph construction is similar to that of the Best Overlap Graph (Miller et al. 2008), having  
112 two vertices for each read representing the start (5'-end) and the end (3'-end) of the read. In this  
113 representation, the graph does not need to be a multigraph. Let  $X^s$  and  $X^e$  be the two vertices  
114 generated from each read  $X$ . If the end of read  $A$  has an overlap with the start of read  $B$ , this  
115 overlap is represented with the edge  $\{A^e, B^s\}$ . Conversely, if the end of read  $A$  has an overlap  
116 with the start of the reverse complement of  $B$ , this overlap will be represented by the edge  
117  $\{A^e, B^e\}$ . In our representation, the graph is completely undirected to take into account that reads  
118 are sequenced from the two strands of the initial template with equal probability and hence,  
119 there is no a-priori information on which one should be considered the positive strand.

120 Similarly to the graph construction implemented in WTDBG (Ruan and Li 2019), we built a  
121 minimizers table from the reads, to identify overlaps in linear time relative to the total number of  
122 sequenced base pairs. However, we implemented a different procedure to calculate hash  
123 codes, that changes the priority to select k-mers as minimizers. Before calculating minimizers,  
124 we first build a 15-mer spectrum table, calculating the count distribution across the reads.  
125 Analyzing this distribution, the algorithm infers the mode that corresponds to the average read  
126 depth, and estimates the assembly size. To achieve an efficient calculation of the k-mer  
127 distribution, the spectrum table is built with a fixed k-mer length of 15 (instead of the input k-mer

6

128 length used later), because that is the maximum length to create the table as a fixed array of  
 129 length  $2^{30}$  in which the index of the array corresponds to a unique encoding of each possible  
 130 DNA k-mer. The data type of this array is a two-byte integer to store a count per k-mer up to  $2^{15}$ ,  
 131 which is enough for real whole genome sequencing datasets. This implementation ensures a  
 132 fixed memory usage of  $2^{31}$  bytes (about 2 gigabytes), regardless of the input size and genome  
 133 complexity. The 15-mer spectrum allows not only to approximate the assembly length and  
 134 average read depth, but also to calculate the hash value of read k-mers.

A

|   |          |         |         |     |          |     |            |
|---|----------|---------|---------|-----|----------|-----|------------|
|   | $2^{15}$ |         |         |     |          |     |            |
| k | AAAAAAA  | AAAAAAC | AAAAAAG | ... | TCACTCGG | ... | TTTTTTTT   |
| b | 0        | 1       | 2       |     | 12345678 |     | $2^{15}-1$ |
| x | 2500     | 2000    | 2300    |     | 50       | ... | 2500       |

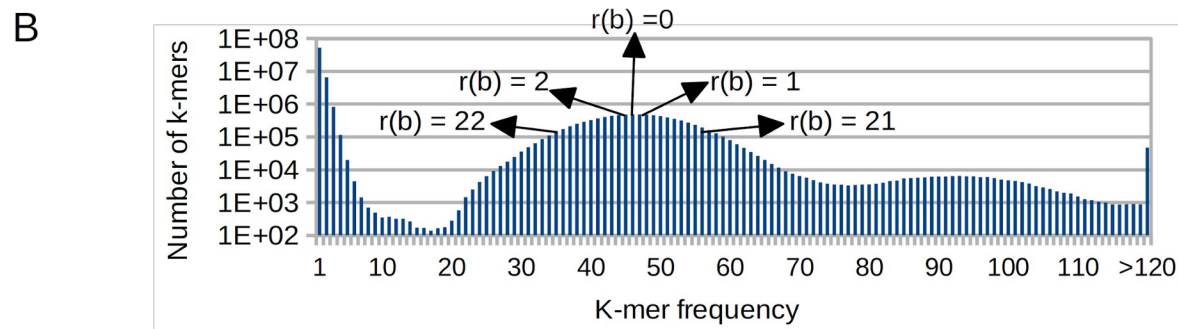

C

$$h(b) = (\#y | :r(y) < r(b)) + b\%p(x)$$

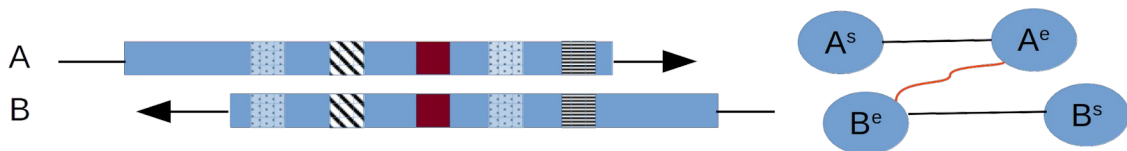

135

136 Figure 1. Overview of the graph construction algorithm implemented in NGSEP for de-novo assembly of  
 137 long reads. A. Fixed array to calculate counts of 15-mers. B. The distribution of k-mer frequencies is used  
 138 to rank edges based on their distance from the peak corresponding to single copy regions. C. A hash  
 139 value is calculated from the rank to select minimizers and identify overlaps. Dynamic programming is  
 140 used to cluster k-mer hits.

141

142 To identify overlaps, k-mers of a user-defined length (up to 31) are calculated for each read.  
143 Each k-mer is uniquely encoded as a 62-bit number  $b$  and the count  $x$  of the 15-mer suffix on  
144 the 15-mer spectrum is calculated. A rank  $r(x)$  is calculated from the count, as two times the  
145 distance from the mode corresponding to the haploid number. The hash value  $h(b)$  is calculated  
146 as the number of k-mers with rankings smaller than  $r(x)$  plus the module of the division between  
147  $b$  and the smallest prime number larger than  $x$ . This last term is a simple scheme to simulate  
148 randomness for k-mers within the same rank. This hashing scheme allows the prioritization of  
149 real k-mers that are likely to come from single-copy regions of the haploid genome during the  
150 calculation of minimizers. At the same time, k-mers from repetitive regions have larger hash  
151 codes, which reduces their priority to become minimizers but does not discard them completely.  
152 We implemented a simulated alignment of each candidate overlap to calculate different  
153 measures associated with each edge in the overlap graph, avoiding a complete pairwise  
154 alignment between candidate pairs at this stage of the process. First, matching k-mers  
155 (minimizers) between a subject (longer) read and a query (shorter) read are clustered based on  
156 consistency of the prediction of overlap start that can be inferred from the relative location of the  
157 k-mer in the subject sequence. Assuming that indel errors are randomly distributed across the  
158 two sequences and that insertion and deletion errors have a similar probability of occurrence,  
159 the inferred starting point for k-mers corresponding to a real overlap should be consistent (have  
160 a low variance). Conversely, inferred starting points for matching k-mers supporting false  
161 positive overlaps due to repetitive structures (up to a certain length) should have a larger  
162 variance. We implemented a clustering procedure similar to k-means to group k-mer hits that  
163 are likely to support the same alignment, using the inferred starting points as centroids. The  
164 average number of k-mer hits for each k-mer is used to infer the number of different clusters  
165 that can be expected. Up to two clusters with the largest k-mer count are retained as long as  
166 they support two of the four possible alignment configurations (start-start, start-end, end-start,  
167 and end-end). Because an overlap length can also be inferred from each matching k-mer, the

168 overlap for a cluster of matching k-mers is inferred as the average of the inferences performed  
169 from each matching k-mer.

### 170 **Layout construction as an edge selection problem**

171 The statistics collected during the simulated alignment step are used during the layout stage to  
172 select edges that will be part of the assembly paths. For each edge, derived from a k-mers  
173 cluster, relevant statistics include the predicted overlap, the number of shared k-mers building  
174 the overlap, the number of base pairs from the subject sequence covered by the shared k-mers  
175 (CSK), and the first and the last position of both the subject and the query sequence having k-  
176 mers supporting the possible overlap. The layout algorithm ranks and selects edges based on  
177 the knowledge that can be inferred from the distribution of the different statistics. Although in a  
178 real experiment true layout edges are unknown, we first identify edges that are reciprocal best  
179 for their corresponding vertices, both in terms of overlap length and CSK, and that connect  
180 vertices with total degree less than three standard deviations from the average. These edges  
181 are termed “safe” and it is assumed that they will be part of the layout. Because they are  
182 reciprocal best, these edges will generate an initial series of paths within the graph. Moreover, it  
183 is assumed that the distribution of overlap length and CSK calculated from these edges would  
184 be a good representation of the distributions calculated from all true layout edges. The cost of  
185 each remaining edge is calculated as a likelihood of the edge features given the distributions  
186 inferred from the safe edges. Whereas a normal distribution is fitted for the overlap and the  
187 CSK, a beta distribution is fitted for the proportion of overlap calculated from the first and the  
188 last overlap position supported by k-mers. Likelihoods are calculated as p-values of the edge  
189 features. Log-likelihoods of the features are added to calculate the total edge likelihood and sort  
190 edges based on this feature. Edges are then traversed in descending order to augment the  
191 paths initially derived from safe edges. An edge is selected if it does not include an internal path  
192 vertex and if it does not create a cycle. Figure 2 shows a schematic diagram of this procedure.



9

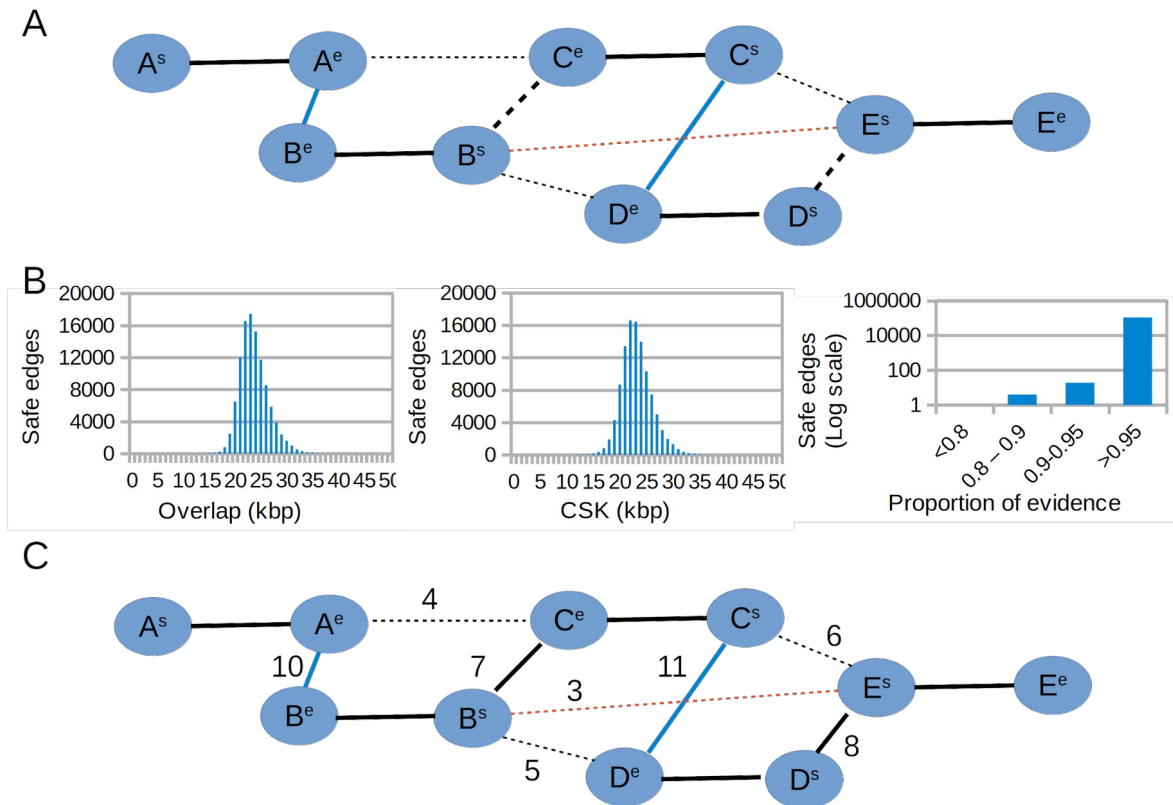

193

194 Figure 2. Layout algorithm. A. Safe edges (blue) are selected as reciprocal best in both overlap and  
 195 coverage of shared Kmers (CSK). The red edge represents a false positive. Bold solid black edges  
 196 connect vertices of the same read. Bold dashed edges are true layout edges that are not reciprocal best.  
 197 Other dashed lines represent true non-layout edges. B. Distributions of overlap, CSK and proportion of  
 198 evidence for safe edges of the rice 20 Kbp PacBio HiFi data (details in the next section). C. Log  
 199 likelihoods are calculated for each edge based on the distributions; layout edges not selected in the first  
 200 step are selected based on their ranking.

201

202 Once paths are constructed, an initial consensus is built concatenating layout vertices. On each  
 203 step, the next read is aligned to the consensus end to recalculate the true overlap and the  
 204 consensus is augmented with the substring corresponding to the overhang of the alignment. At  
 205 the same time, embedded reads are recovered and mapped to the consensus. Once all reads  
 206 are mapped, the following polishing algorithm is executed to improve the per base quality of the  
 207 assembly: first, pileups are calculated for each position to identify the base with the largest

10

208 count and update the consensus if needed. Then, similar to the process to call variants, a  
209 second step calculates “active regions” across the alignment, which are defined as contiguous  
210 regions in which each base pair is at most 5 bp away from an indel call. Once active regions are  
211 calculated, a de-Bruijn graph is built from the read segments spanning the active region and a  
212 mini-assembly is executed to calculate the corrected segment.

213

### 214 **Benchmark with PacBio HiFi data**

215 To test the performance of NGSEP with PacBio HiFi data, we assembled genomes from publicly  
216 available HiFi reads of the indica rice variety Minghui 63 (15 Kbp and 20 Kbp reads), the B73  
217 maize inbred line, and the human cell line CHM 13 using NGSEP and three commonly used  
218 tools (Canu, Flye, and HiFiASM). Figure 3 shows the results of these benchmark experiments.  
219 The contiguity of each assembly, measured as the Nx curve, is contrasted with the number of  
220 misassemblies against a curated reference genome, as measured by Quast (Gurevich et al.  
221 2013). The complete statistics are available in the Supplementary Table T1.

222 Regarding the rice data, the assemblies generated by HiFiASM and NGSEP have the highest  
223 N50 values for the 15 Kbp and 20 Kbp datasets respectively. In both cases, at least 95% of the  
224 genome (395 Mbp) was assembled in less than 20 contigs. Canu ranks third, close to NGSEP  
225 for the 15 Kbp dataset and close to HiFiAsm for the 20 Kbp data. Flye shows the lowest  
226 contiguity in all datasets (Figure 3A). Conversely, for the maize and the CHM13 datasets, the  
227 assemblies generated by NGSEP have lower contiguity compared to those generated by  
228 HiFiAsm and Canu, but still have better contiguity compared to the assemblies generated using  
229 Flye. For the maize dataset all the tools assembled the genome in more than 500 contigs with  
230 minimum length of 50 Kbp. Using this dataset, the N50 value ranged from 4.4 Mbp (Flye) to 37  
231 Mbp (HiFiASM). This is probably caused by a lower average read depth and higher complexity,  
232 as compared to the rice datasets. The same behavior was observed in the human cell line

11

233 where the assembled genomes were highly fragmented and the N50 value ranged from 29 Mbp  
 234 (Flye) to 86 Mbp (HiFiASM).

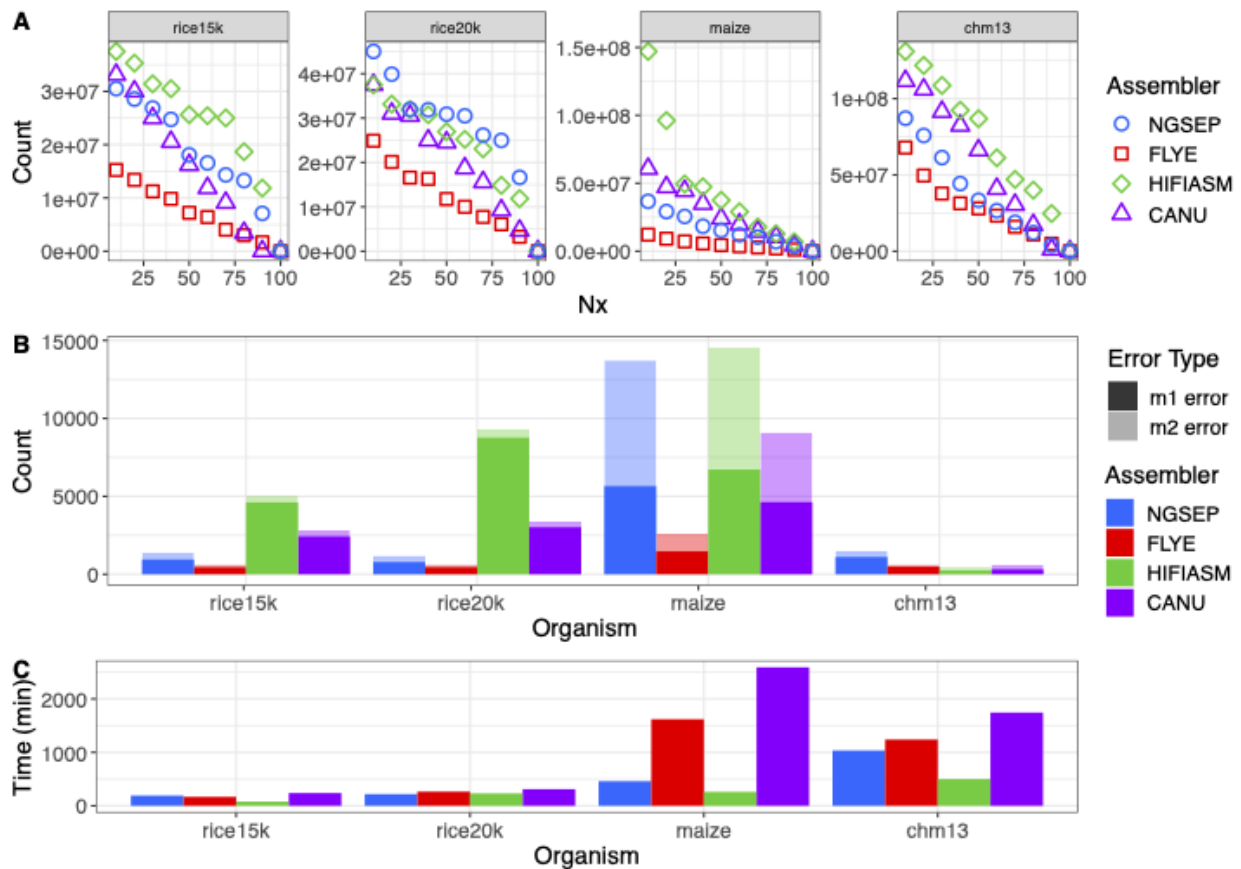

235

236 Figure 3. Assembly results for haploid or inbred samples. A. Nx curve B. Misassemblies(m1 error) and  
 237 local misassemblies (m2 error) reported vs reference genomes. Rice15k corresponds to *Oryza sativa* 15k  
 238 HiFi reads, rice20k to *O. sativa* 20k HiFi reads, maize corresponds to *Zea mays B73* HiFi reads, and  
 239 chm13 corresponds to the human cell line chm13. C. Execution time (in minutes) for each experiment.

240 Figure 3B shows the number of misassembly errors identified by Quast, using a curated  
 241 reference genome for comparison. Errors are classified as long-range misassemblies (m1) and  
 242 local misassemblies (m2). With the exception of the maize assemblies produced by NGSEP and  
 243 HiFiAsm, most assemblies reported more m1 errors than m2 errors. Flye assemblies reported  
 244 the lowest numbers of misassemblies for the plant samples, whereas the HiFiAsm assembly  
 245 reported the lowest number for CHM13. Conversely, HifiASM assemblies reported the highest

12

246 total number of misassemblies for plant samples. The number of errors in assemblies generated  
247 with NGSEP on the rice samples was about 1.6 times higher than the number of errors  
248 generated by Flye, but it was up to 5 times lower than the number of errors generated by  
249 HiFiAsm. Additionally, in the maize sample, NGSEP generated fewer misassemblies than  
250 HiFiAsm.

251 Regarding computational efficiency, Figure 3C shows a comparison of the runtimes (having  
252 available 32 threads) required by each tool to assemble each of the datasets. HiFiAsm and  
253 Canu are consistently the fastest and the slowest tools respectively. NGSEP requires a lower  
254 runtime than Flye in all datasets except for the rice 15 Kbp dataset, where Flye finishes 24  
255 minutes faster than NGSEP. In absolute numbers, NGSEP is able to assemble the rice datasets  
256 in less than 4 hours, the maize dataset in less than 8 hours, and the CHM13 dataset in less than  
257 18 hours.

258 Combining the evaluation of accuracy and efficiency, NGSEP has better computational  
259 efficiency than Flye and Canu and the assemblies have better contiguity than those of Flye, and  
260 fewer misassemblies than most of those assembled using Canu. Compared to HiFiAsm  
261 assemblies, NGSEP assemblies of plant samples have lower error rates and the 20 Kbp  
262 NGSEP assembly showed the best contiguity for rice.

263

## 264 **Assembly and haplotyping of diploid samples**

265 We integrated our previous implementation of the ReFHap and the DGS algorithms to perform  
266 single individual haplotyping of diploid heterozygous samples (Duitama et al. 2012). Unlike the  
267 previous implementation, which received a non-standard file with base calls for each  
268 heterozygous site, the two algorithms can now be executed from the VCF file with individual  
269 genotype calls and a BAM file with long reads aligned to the reference genome and sorted by  
270 reference coordinates. Moreover, we integrated the ReFHap algorithm within the assembly

271 process of diploid samples to obtain phased genome assemblies from HiFi reads. ReFHap is  
272 executed independently on reads aligned to an initial assembly, which is generated using the  
273 methods described above for haploid samples. The goal of this phase is to identify and break  
274 edges in the assembly graph connecting reads sequenced from different haplotypes. Large  
275 deletions and regions of homozygosity larger than the read length usually break each contig into  
276 haplotype blocks (Cheng et al. 2021). Read depth within each block and between block  
277 boundaries is calculated to break the contig in contiguous regions classified as true phased  
278 regions, large heterozygous deletions, or regions with high homozygosity. Edges connecting  
279 reads within true phased regions and assigned to different haplotype clusters are removed from  
280 the assembly graph.

281 To validate the accuracy of the complete process to assemble phased genomes, we first  
282 simulated two single chromosome diploid genomes. The first was constructed from two publicly  
283 available MHC alleles. The second was constructed from the copies of the rice chromosome 9  
284 corresponding to the Nipponbare and the MH63 assemblies. A high heterozygosity rate is  
285 expected in both cases. We assembled simulated reads from both individuals using both  
286 NGSEP and HiFiAsm. For the MHC haplotypes, NGSEP was able to reconstruct the reference  
287 allele in two contigs of lengths 4.4 Mbp and 0.3 Mbp, and the alternative allele in three contigs  
288 of lengths 3.5 Mbp, 0.5 Mbp and 0.2 Mbp (Supplementary figure S1). No switch errors (changes  
289 between real alleles within a contig) were detected in this assembly. Conversely, three contigs  
290 assembled by HiFiAsm, with lengths of 4.4 Mbp, 0.8 Mbp and 1.6 Mbp, mapped to the  
291 alternative MHC allele and one contig of 2.8 Mbp mapped to the reference MHC allele. Hence,  
292 the alternative allele was overrepresented, having the two smaller contigs embedded within the  
293 largest contig. The largest contig was also larger than the original allele because the left 100  
294 Kbp could not be mapped and the right 200 Kbp was duplicated. Conversely, the reference  
295 allele was sub represented. Figure 4 shows the reconstruction of the rice alleles by NGSEP and  
296 HiFiAsm. NGSEP assembled one large contig having three switch errors and five additional

14

297 contigs covering the regions not covered by the first contig. HiFiAsm assembled most of the  
298 MH63 chromosome in two contigs and most of the Nipponbare chromosome also in two contigs.  
299 Three switch errors were detected in this case. It also produced four small contigs (about 200  
300 Kbp), two of them overlapping with longer contigs.  
301

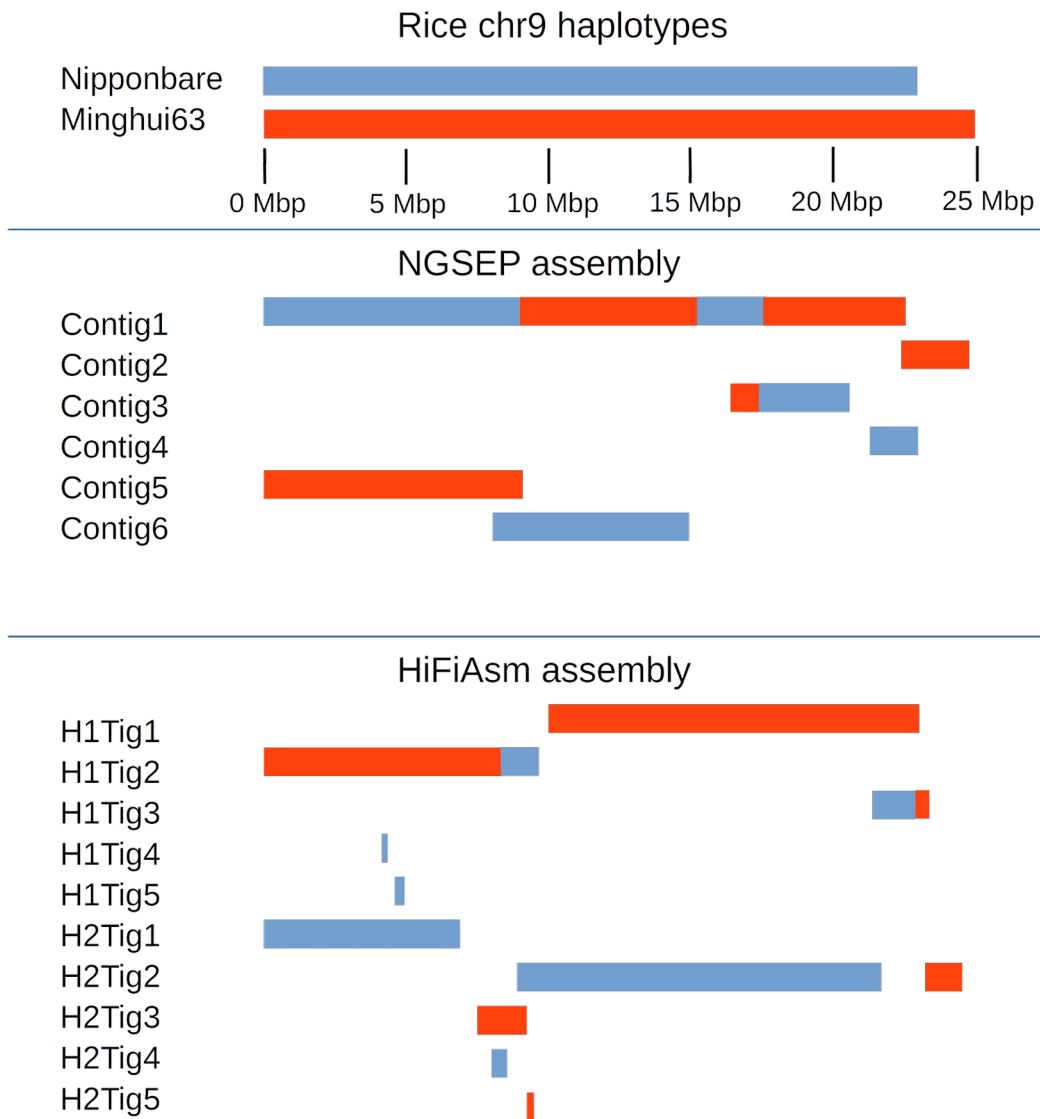

302

303 Figure 4. Results of a diploid assembly of a simulated diploid individual built from the chromosome 9  
304 sequences of the rice japonica accession Nipponbare and the Indica accession Minghui63. Blue blocks  
305 show Nipponbare haplotypes, whereas red blocks indicate Minghui63 haplotypes. Changes in color in the  
306 same row represent switch errors.

15

307 To further assess the performance of NGSEP assembling diploid samples, we executed  
308 assemblies from publicly available HiFi reads of the human individual HG002. NGSEP  
309 generated an assembly with a total length of 5,593.63 Mbp distributed into 12,318 contigs. The  
310 NGA50 was 1.68 Mbp. In contrast, HiFiAsm produced an assembly of 5,979.17 Gbp distributed  
311 into 851 contigs and a NGA50 of 91.07 Mbp. Despite the large difference in contiguity, we also  
312 collected some of the metrics proposed by Cheng et al. 2021, related to the ability of the  
313 assembly to reconstruct the two alleles of each gene present in the diploid sample (Table 1).  
314 For the case of HiFiAsm, we calculated the metrics for both the primary assembly and the  
315 phased assembly. From the 35,547 single-copy genes in the reference genome, NGSEP  
316 recovered 81% of them, and HiFiASM recovered 89% in the phased assembly and 98% in the  
317 primary assembly. However, the NGSEP assembly included the two alleles for 13,183 genes  
318 (37.08%) whereas the phased assembly of HiFiAsm recovered two alleles for only 8,484 genes  
319 (23.86%). The primary assembly of HiFiAsm, which is expected to be a haploid representation  
320 of the genome, only has more than one copy for 156 single copy genes. NGSEP also identified  
321 a larger number of multicopy genes compared to HiFiAsm, although the total number of  
322 multicopy reconstructed alleles was lower for the NGSEP assembly compared to the HiFiAsm  
323 assembly. In terms of computational efficiency, both tools were able to reconstruct the genome  
324 in about 50 hours using 32 threads.

325

326

327

328

329

330

331

16

332 Table 1. Metrics for diploid assemblies using NGSEP and HiFiAsm over the human HG002  
333 diploid cell line.

| <b>Metric</b>                                            | <b>NGSEP</b> | <b>HiFiAsm<br/>phased</b> | <b>HiFiAsm<br/>primary</b> |
|----------------------------------------------------------|--------------|---------------------------|----------------------------|
| Length (Mbp)                                             | 5,593.63     | 5,979.17                  | 3,109.3                    |
| NGA50 (Mbp)                                              | 1.68         | 91.07                     | 69.24                      |
| Single copy genes in both the reference and the assembly | 15,638       | 23,045                    | 34,793                     |
| Single copy genes duplicated in the assembly             | 13,183       | 8,484                     | 156                        |
| Single copy genes with exons mapped in different contigs | 209          | 5                         | 7                          |
| Single copy genes with 50%-99% of sequence mapped        | 674          | 93                        | 67                         |
| Single copy genes with 10% - 50% of sequence mapped      | 477          | 23                        | 3                          |
| Single copy genes with < 10% of sequence mapped          | 5,366        | 3,897                     | 521                        |
| Duplicated genes in the reference found in the assembly  | 2,226        | 1,551                     | 1,422                      |
| Total alleles of duplicated genes                        | 7,499        | 8,187                     | 8,266                      |
| Fraction of missing multicopy genes                      | 0.61         | 0.73                      | 0.62                       |
| Gene completeness (asmgene) (%)                          | 81           | 89                        | 98                         |
| Execution time (h)                                       | 49           | 52                        | 52                         |

334

335

336



17

### 337 **Benchmark with ONT data**

338 To test the performance of our algorithms with Nanopore reads, we downloaded and assembled  
339 datasets of Nanopore reads sequenced from samples of *Escherichia coli*, *Saccharomyces*  
340 *cerevisiae*, and *Drosophila melanogaster*. We compared the assemblies obtained using Canu,  
341 Flye, and NECAT, as well as NGSEP. Figure 5 shows the statistics of these assemblies  
342 comparing these tools. Complete assembly statistics are shown in the Supplementary Table T2.  
343 For *E. coli*, the most contiguous assembly was obtained with NGSEP after error correction using  
344 NECAT. This genome was assembled in one contig by all tools except Flye, which reported two  
345 contigs. Using this dataset, the N50 value ranged from 3.57 Mbp (Flye) to 4.62 Mbp (NGSEP).  
346 The yeast genome was assembled in its 17 chromosomes by NECAT with an N50 of 0.94 Mbp  
347 and by NGSEP with an N50 of 0.81 Mbp after performing error correction with NECAT. The next  
348 best tool was Canu, reporting 33 contigs and an N50 of 0.81 Mbp. Finally, Flye assembled the  
349 yeast genome in 33 contigs with N50 equal to 0.8 Mbp. The last dataset included in our  
350 analyses consisted of reads from the fruit fly. This genome was assembled in 679 contigs (N50  
351 0.91 Mbp) using NGSEP with NECAT error correction, which was the lowest number of contigs  
352 obtained. However, Flye achieved an N50 of 1.1 Mbp, being the best result obtained for this  
353 dataset. Canu reported 3858 contigs with an N50 of 0.43 Mbp. Unfortunately, NECAT failed to  
354 assemble these sequences with the available computational resources, requiring more than 60  
355 GB of RAM memory for this process.

356

357

18

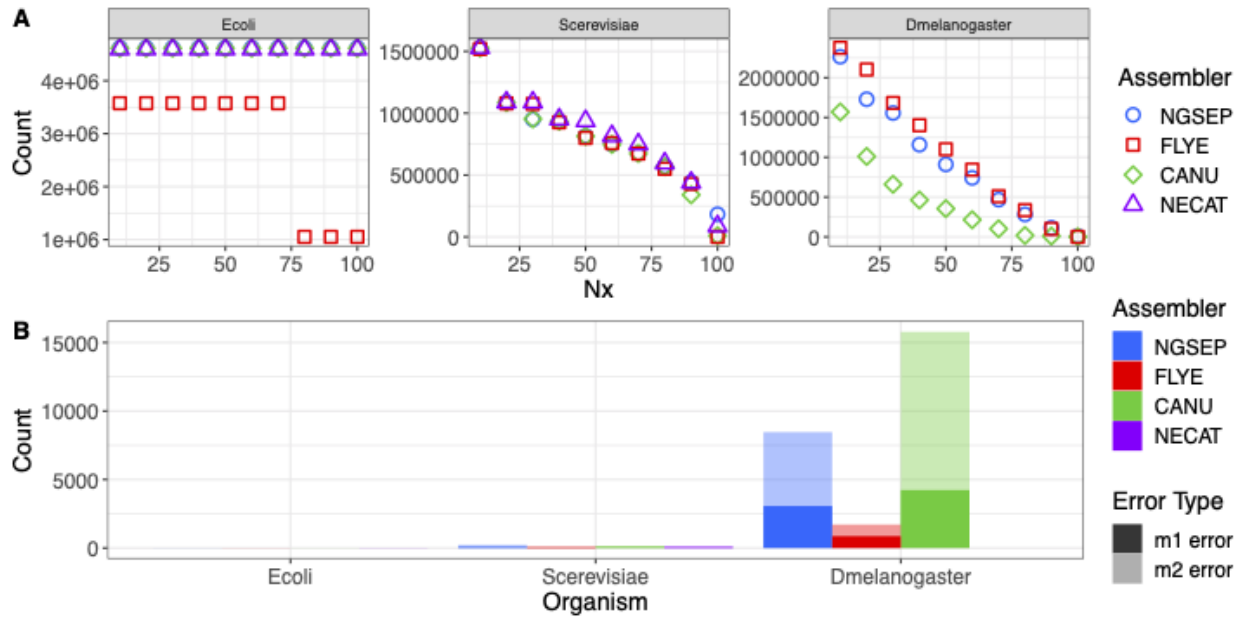

358

359 Figure 5. Haploid genomes assembly results using ONT reads. A. Nx curve B. Misassemblies (m1 error)

360 and local misassemblies (m2 error) reported for each genome vs reference genomes.

361

## 362 Other related features

363 Based on the development of the genome assembler, version 4 of NGSEP also includes a  
364 module to calculate the spectrum of k-mer counts, either from sequencing reads or from a  
365 genome assembly. For a k-mer size less or equal to 15, the k-mer counts are stored in a fixed  
366 array of 2-byte integers of size  $2^{30}$ . This allows to create the spectrum with a fixed RAM usage  
367 of 2 gigabytes for an arbitrary number of input reads. Based on this spectrum of k-mers, we  
368 included a functionality for error correction in which substitution errors can be corrected by  
369 looking at single changes producing k-mers within the distribution of k-mer counts. Moreover,  
370 the minimizers table generated to perform efficient identification of read overlaps was also used  
371 to create a reference alignment tool for long reads. To keep the algorithm memory tractable,  
372 minimizers appearing 1,000 or more times within the reference sequence are discarded.  
373 Minimizers for each read are calculated and searched in the minimizers table corresponding to  
374 the reference sequence. Minimizer hits are interpreted as k-mer ungapped alignments and

375 clustered according to the read start site predicted for each read. We assessed the performance  
376 of the minimizers algorithm implemented in NGSEP for aligning simulated long reads,  
377 comparing the results with the alignments obtained using Minimap2 (Li H 2018). Both tools  
378 achieved almost perfect accuracy for *S. aureus* and *S. cerevisiae* genomes. Minimap2 showed  
379 3% higher mapping accuracy for the experiment with the human chr20 but NGSEP reported  
380 lower root mean squared error (RMSE) values (Supplementary figure S2).

381 Finally, for circular genomes we implemented a circularization feature as an option of the  
382 genome assembler. Given an input set of possible origin sequences, NGSEP maps these  
383 sequences to the assembled contigs using the long read alignment algorithm. Each presumably  
384 circular contig is rotated and oriented based on the best alignment of an origin sequence.

385

## 386 **DISCUSSION**

387 In this work, we present the results of our latest developments to facilitate de-novo construction  
388 of genome assemblies using long reads, which includes novel algorithmic approaches to  
389 perform the different steps of the Overlap-Layout-Consensus model. Experiments with a wide  
390 variety of datasets indicate that our approach achieves competitive accuracy and efficiency,  
391 compared to state-of-the-art tools. From the user perspective, NGSEP achieves nearly perfect  
392 assemblies for several species and it is able to reconstruct most gene-rich regions, even in  
393 complex genomes. One major advantage of our software is that, combined with previous  
394 developments, it offers an easy-to-use, open source and platform independent framework to run  
395 a complete analysis of high throughput sequencing reads, including de-novo assembly, read  
396 mapping, variants detection, genotyping, and downstream analysis of genomic variation  
397 datasets.

398 The algorithms designed and implemented in NGSEP contribute new alternatives to identify  
399 solutions to the genome assembly problem. Although the graph construction with two vertices

400 per read has been used in previous works (Miller et al. 2008, Koren et al. 2017), current  
401 software tools seem to implement the classical directed string graph, which requires taking early  
402 decisions on the orientation of each read (Cheng et al. 2021). We believe that the undirected  
403 graph used in this work makes a better representation for DNA sequences compared to the  
404 string graph because it takes into account that DNA is double-stranded and hence it captures  
405 more information from the input reads. This allows devising algorithmic approaches different  
406 from a greedy traversal of a curated string graph. Moreover, to achieve improved computational  
407 efficiency, we avoided complete alignments between reads. Instead, we performed estimations  
408 of different types of information (overlap, CSK and percentage of the overlap supported by  
409 evidence), that can be used as features to select edges building assembly paths based on a  
410 likelihood calculation for each edge. The layout algorithm of NGSEP is inspired by the classical  
411 Christofides algorithm for the travel salesman problem, treating the path construction as an  
412 edge selection process. Edge features are combined based on their likelihood, replacing edge  
413 filtering by edge prioritization. This approach eliminates the need of hard filtering decisions and  
414 makes the algorithm adaptable to genomic regions with different repeat structures, as well as to  
415 the analysis of reads with variable sequencing error rates.

416 Taking into consideration Nx curves and misassemblies, NGSEP produces high-quality  
417 assemblies with higher contiguity than Flye and a lower number of errors compared to Canu  
418 and HiFiASM. These statistics suggest that NGSEP can be used as an accurate alternative to  
419 assemble PacBio HiFi reads. Although further work is required to improve N50 in complex  
420 assemblies (especially human diploid samples), our results indicate that the contiguity achieved  
421 by NGSEP assemblies is enough to reconstruct most gene elements and, moreover, it seems to  
422 perform a better allele reconstruction for diploid genomes, compared to HiFiAsm. As shown by  
423 recent works (Garg et al. 2021, Nurk et al. 2022, Porubsky et al. 2021), contiguous haploid and  
424 diploid assemblies of complex genomes still require the integration of data from technologies or  
425 strategies that provide scaffolding and phasing information such as Hi-C or parental

21

426 sequencing. However, our experiments with diploid samples indicate that new algorithms  
427 implemented in existing or novel tools could significantly improve the accuracy of phased  
428 assemblies directly from long reads.

429 Regarding Oxford Nanopore reads with high error rates, NGSEP was able to perform accurate  
430 assemblies after reads were corrected running the specialized algorithm implemented in  
431 NECAT. This error correction step is crucial in the assembly process of current ONT reads.  
432 However, upcoming improvements in the read quality are likely to produce ONT HiFi reads,  
433 eliminating the need of a specialized error correction step.

434 We believe that the new algorithms presented in this manuscript make a significant contribution  
435 to the development of bioinformatic algorithms and tools for genome assembly. Moreover, the  
436 new functionalities of NGSEP facilitate the construction of genome assemblies to researchers  
437 working on a wide range of species.

438

## 439 **METHODS**

### 440 **Benchmark datasets**

441 PacBio and Nanopore publicly available raw datasets were retrieved from NCBI. Haploid  
442 datasets included PacBio HiFi/Circular Consensus Sequence (CCS) 20k reads from *Oryza*  
443 *sativa* Indica MH63 accession ([PRJNA558396](#)) (Song et al. 2021) and 15k reads from *Oryza*  
444 *sativa* Indica MH63 accession (SRR10188372), PacBio CSS from *Zea mays* B73 accession  
445 ([PRJNA627939](#)) (Hon et al. 2020), and PacBio CCS from the CHM13 human haploid cell line  
446 ([PRJNA530776](#)) (Nurk et al. 2022). The human male HG002/NA24385 was used as the diploid  
447 dataset ([PRJNA586863](#)). Nanopore reads for *Escherichia coli* K12 were obtained from the  
448 Loman Lab available at <http://lab.loman.net/2015/09/24/first-sqk-map-006-experiment/> (Loman  
449 et al. 2015). We selected run MAP-006-1, which also corresponds to the dataset used by Canu

22

450 in their tutorial. Nanopore reads for *Saccharomyces cerevisiae*, and *Drosophila melanogaster*  
451 were directly downloaded from <http://www.tgsbioinformatics.com/necat/> (Chen et al. 2021).

452

### 453 **Long read haploid genome assembly tools comparison**

454 We compared the performance of the algorithm described in this work with the algorithms  
455 implemented in HiCanu (Nurk et al. 2020), Flye (Kolmogorov et al. 2019), and HiFiASM (Cheng  
456 et al. 2021) for PacBio HiFi reads; and with the algorithms implemented in Canu, Flye, and  
457 NECAT (Chen et al. 2021) for Nanopore reads. WTDBG (Ruan and Li 2019) was not included  
458 because in some initial benchmark experiments it reported a much lower accuracy for complex  
459 genomes, compared to other tools, and because it seems to be replaced by HiFiAsm. All  
460 PacBio assemblies were run in a Microsoft Azure Standard E64as\_v4 (64 vcpus, 512 GiB  
461 memory) virtual machine. The parameters used for each tool are detailed in the Supplementary  
462 Table T3 and Supplementary Table T4.

463

### 464 **Comparison of genome assemblies with reference genomes**

465 To compare the assembly achieved by each tool against a reference genome, we used Quast  
466 with default parameters (Gurevich et al. 2013). Whereas reference coverage, assembly length  
467 and N50 were used as sensitivity measures, number and type of misassemblies were used as  
468 specificity measures. We calculated and compared these statistics among all assemblies per  
469 dataset. The Nx curve was also calculated for each assembly. The reference genomes used in  
470 the comparison were *Oryza sativa* Indica MH63 (CP054676–CP054688) (Song et al. 2021), *Zea*  
471 *mays* B73 v.5 (GCA\_902167145.1) (Jiao et al. 2017), human haploid line CHM13 v2.0  
472 (<https://github.com/marbl/CHM13>) (Nurk et al. 2022); the genomes of *Drosophila melanogaster*  
473 v.6, *Escherichia coli* K12, and *Saccharomyces cerevisiae* S288c were downloaded from the  
474 NECAT web site (Chen et al. 2021).

23

475

## 476 **Diploid genomes benchmarking**

477 Simulations: To assess the accuracy of the algorithm implemented in NGSEP for reconstruction  
478 of diploid samples, we simulated two single chromosome individuals. First, we built a synthetic  
479 individual joining two different MHC alleles: the reference allele extracted from GRCh38, and an  
480 alternative reconstruction available at the NCBI nucleotide database (accession NT\_167249),  
481 generated as part of the MHC haplotype project (Horton et al. 2008). Second, we built an  
482 individual joining the rice chromosome 9 reconstructions of the reference genome (Nipponbare)  
483 and MH63. We simulated 10,000 and 125,000 reads respectively from each simulated diploid  
484 individual using the SingleReadsSimulator of NGSEP with average length of 20 Kbp, a standard  
485 deviation of 5 Kbp, a substitution error rate of 0.5% and an indel error rate of 1%.

486 HG002: NGSEP v4.0.1 and HiFiAsm v0.16.0 (Cheng et al. 2021) were employed to obtain a  
487 diploid assembly for the Personal Genome Project Ashkenazi Jewish son HG002 (four runs with  
488 accession numbers SRR10382244, SRR10382245, SRR10382248 and SRR10382249) . We  
489 registered time of execution over a node with an AMD EPYC 7402 2.80 Hz, 24C/48T, 128M  
490 Cache, a DDR4-3200 processor, 32 cores and 512Gb of RAM. We converted the output files  
491 from HiFiAsm (\*ctg.gfa) to fasta (\*.fa) and merged the haplotypes (\*hap1.p\_ctg.fa and  
492 \*hap2.p\_ctg.fa) to calculate the main metrics and compare against the NGSEP diploid  
493 assembly. Metrics such as N50 and L50 were obtained using Quast v5.0.2. A validation of those  
494 metrics was obtained using minigraph v0.19 (Li et al. 2020) and paftools v2.24-r1132-dirty (Li H  
495 2018).

496 Structural variations are commonly mistaken as misassemblies by current alignment-based  
497 evaluations. Hence, the reference-based asmgene method was used to calculate both gene  
498 completeness and the number of missing multi-copy genes as additional assembly-quality  
499 indicators. According to Cheng et al. 2021, gene completeness equals to

24

500  $|\{SCorMCinASM\} \cap \{SCinREF\}| / |\{SCinREF\}|$ , where  $\{SCinREF\}$  corresponds to the set of  
501 single-copy genes in the reference genome and  $\{SCorMCinASM\}$  refers to the union sets of  
502 single-copy and multicopy genes in the assembly. Likewise, missing multi-copy genes are  
503 calculated as  $1 - |\{MCinASM\} \cap \{MCinREF\}| / |\{MCinREF\}|$ . For clarity purposes, a gene  
504 is considered as a single copy (SC) if only one match is described into the reference genome (at  
505 a 99% of identity), otherwise it is a multi-copy (MC) gene.

506

### 507 **Accuracy assessment for long read alignment**

508 Simulated reads were aligned against their respective reference sequence using Minimap2  
509 v2.17 (Li H 2018) and the ReadsAligner command of NGSEP v4.2.1 with k-mer lengths of 15  
510 (Default mode) and 20. Default parameters were used for all aligners. For time performance  
511 evaluation, we conducted all alignments using 4 cores of processing and 20 GB of memory. We  
512 evaluated the accuracy of the aligners using percentage of aligned reads, as well as sensitivity  
513 and false positive rate metrics. These metrics were calculated using a script that, taking an  
514 alignment file as input, infers the real position in the reference genome for each aligned read  
515 from the read name and calculates the difference with the position where the read is aligned.  
516 Total alignment rate and RMSE are calculated after the total number of aligned reads is counted  
517 and the square error rate is totalized over the alignments. This script is available with the  
518 NGSEP distribution (class `ngsep.benchmark.QualityStatisticsAlignmentSimulatedReads`).  
519 Accuracy metrics were computed for bam files filtered by alignment quality values from 0 to 80.

520

### 521 **COMPETING INTEREST STATEMENT**

522 The authors declare that there are no competing interest related to the work presented in this  
523 manuscript.

524



## 525 **ACKNOWLEDGEMENTS**

526 This work has been supported by the Colombian research fund “PATRIMONIO AUTÓNOMO  
527 FONDO NACIONAL DE FINANCIAMIENTO PARA LA CIENCIA, LA TECNOLOGÍA Y LA  
528 INNOVACIÓN FRANCISCO JOSÉ DE CALDAS” through the grant with contract number 80740-  
529 441-2020, awarded to JD. This work was also supported by internal funds of Universidad de Los  
530 Andes through the FAPA initiative led by the Vice-presidency of Research and Knowledge  
531 Creation. We also wish to acknowledge the support of the IT Services Department and ExaCore  
532 - IT Core-facility of the Vice Presidency for Research & Creation at the Universidad de Los  
533 Andes that allow us to perform the computational analysis.

534

## 535 **REFERENCES**

- 536 Amarasinghe SL, Su S, Dong X, Zappia L, Ritchie ME, Gouil Q. 2020. Opportunities and challenges in  
537 long-read sequencing data analysis. *Genome Biology* 21: 30. <https://doi.org/10.1186/s13059-020-1935-5>
- 538 Amiri Moghaddam J, Crüsemann M, Alanjary M, Harms H, Davila-Cespedes A, Blom J, Poehlein A,  
539 Ziemert N, König GM, Schaberle TF. 2018. Analysis of the Genome and Metabolome of Marine  
540 Myxobacteria Reveals High Potential for Biosynthesis of Novel Specialized Metabolites. *Scientific Reports*  
541 8: 16600. <https://doi.org/10.1038/s41598-018-34954-y>
- 542 Baker M. 2012. *De novo* genome assembly: what every biologist should know. *Nature Methods* 9: 333–  
543 337. <https://doi.org/10.1038/nmeth.1935>
- 544 Berlin K, Koren S, Chin CS, Drake JP, Landolin JM, Phillippy AM. 2015. Assembling large genomes with  
545 single-molecule sequencing and locality-sensitive hashing. *Nature Biotechnology* 33(6): 623-630.  
546 <https://doi.org/10.1038/nbt.3238>.
- 547 Bhadauria V, MacLachlan R, Pozniak C, Cohen-Skalie A, Li L, Halliday J, Banniza S. 2019. Genetic map-  
548 guided genome assembly reveals a virulence-governing minichromosome in the lentil anthracnose  
549 pathogen *Colletotrichum lentis*. *New Phytologist* 221(1): 431-445. <https://doi.org/10.1111/nph.15369>.

- 550 Chen Y, Nie F, Xie SQ, Zheng YF, Dai Q, Bray T, Wang YX, Xing JF, Huang ZJ, Wang DP, *et al.* 2021.  
551 Efficient assembly of nanopore reads via highly accurate and intact error correction. *Nature*  
552 *Communications* 12: 60. <https://doi.org/10.1038/s41467-020-20236-7>
- 553 Cheng H, Concepcion GT, Feng X, Zhang H, Li H. 2021. Haplotype-resolved de novo assembly using  
554 phased assembly graphs with hifiasm. *Nature Methods* 18: 170-175. [http://doi.org/10.1038/s41592-020-](http://doi.org/10.1038/s41592-020-01056-5)  
555 [01056-5](http://doi.org/10.1038/s41592-020-01056-5)
- 556 Chin CS, Peluso P, Sedlazeck F, Nattestad M, Concepcion GT, Clum A, Dunn C, O'Malley R, Figueroa-  
557 Balderas R, Morales-Cruz A, *et al.* 2016. Phased diploid genome assembly with single-molecule real-  
558 time sequencing. *Nature Methods* 13: 1050-1054. <https://doi.org/10.1038/nmeth.4035>
- 559 Duitama J, McEwen GK, Huebsch T, Palczewski S, Schulz S, Verstrepen K, Suk EK, Hoehe MR. 2012.  
560 Fosmid-based whole genome haplotyping of a HapMap trio child: evaluation of Single Individual  
561 Haplotyping techniques, *Nucleic Acids Research* 40(5): 2041–2053. <https://doi.org/10.1093/nar/gkr1042>
- 562 Garg S, Functamman A, Carroll A, Chou M, Schmitt A, Zhou X, Mac S, Peluso P, Hatas E, Ghurye J,  
563 *et al.* 2021. Chromosome-scale, haplotype-resolved assembly of human genomes. *Nature Biotechnology*  
564 39: 309-312. <https://doi.org/10.1038/s41587-020-0711-0>
- 565 Gurevich A, Saveliev V, Vyahhi N, Tesler G. 2013. QUILT: quality assessment tool for genome  
566 assemblies. *Bioinformatics* 29(8): 1072-1075. <https://doi.org/10.1093/bioinformatics/btt086>
- 567 Hills M, Falconer E, O'Neill K, Sanders AD, Howe K, Guryev V, Lansdorp PM. 2021. Construction of  
568 Whole Genomes from Scaffolds Using Single Cell Strand-Seq Data. *Int. J. Mol. Sci.* 22: 3617.  
569 [https://doi.org/ 10.3390/ijms22073617](https://doi.org/10.3390/ijms22073617)
- 570 Hon T, Mars K, Young G, Tsai YC, Karalius JW, Landolin JM, Maurer N, Kudrna D, Hardigan MA, Steiner  
571 CC, *et al.* 2020. Highly accurate long-read HiFi sequencing data for five complex genomes. *Scientific*  
572 *Data* 7: 399. <https://doi.org/10.1038/s41597-020-00743-4>
- 573 Horton R, Gibson R, Coggill P, Miretti M, Allcock RJ, Almeida J, Forbes S, Gilbert JG, Halls K, Harrow JL,  
574 *et al.* 2008. Variation analysis and gene annotation of eight MHC haplotypes: the MHC Haplotype Project.  
575 *Immunogenetics* 60(1):1-18.

- 576 Hu Y, Colantonio V, Müller BSF, Leach KA, Nanni A, Finegan C, Wang B, Baseggio M, Newton CJ, Juhl  
577 EM, *et al.* 2021. Genome assembly and population genomic analysis provide insights into the evolution  
578 of modern sweet corn. *Nature Communications* 12: 1227. <https://doi.org/10.1038/s41467-021-21380-4>
- 579 Jiao Y, Peluso P, Shi J, Liang T, Stitzer MC, Wang B, Campbell MS, Stein JC, Wei X, Chin CS, *et al.*  
580 2017. Improved maize reference genome with single-molecule technologies. *Nature* 546: 524–527.  
581 <https://doi.org/10.1038/nature22971>
- 582 Kolmogorov M, Yuan J, Lin Y, Pevzner PA. 2019. Assembly of long, error-prone reads using repeat  
583 graphs. *Nature Biotechnology* 37: 540-546. <https://doi.org/10.1038/s41587-019-0072-8>
- 584 Koren S, Walenz BP, Berlin K, Miller JR, Bergman NH, Phillippy AM. 2017. Canu: scalable and accurate  
585 long-read assembly via adaptive k-mer weighting and repeat separation. *Genome Research* 27:722-736.
- 586 Li H. 2018. Minimap2: pairwise alignment for nucleotide sequences. *Bioinformatics* 34 (18): 3094-3100.  
587 <http://doi.org/10.1093/bioinformatics/bty191>
- 588 Li H, Feng X, Chu C. 2020. The design and construction of reference pangenome graphs with minigraph.  
589 *Genome biology*, 21(1): 1-19. <https://doi.org/10.1186/s13059-020-02168-z>
- 590 Loman N, Quick J, Simpson J. 2015. A complete bacterial genome assembled de novo using only  
591 nanopore sequencing data. *Nature Methods* 12, 733–735. <https://doi.org/10.1038/nmeth.3444>
- 592 Low WY, Tearle R, Liu R, Koren S, Rhie A, Bickhart DM, Rosen BD, Kronenberg ZN, Kingan SB, Tseng  
593 E, *et al.* 2020. Haplotype-resolved genomes provide insights into structural variation and gene content in  
594 Angus and Brahman cattle. *Nature communications* 11(1): 2071. [https://doi.org/10.1038/s41467-020-](https://doi.org/10.1038/s41467-020-15848-y)  
595 [15848-y](https://doi.org/10.1038/s41467-020-15848-y)
- 596 Miller JR, Delcher AL, Koren S, Venter E, Walenz BP, Brownley A, Johnson J, Li K, Mobarry C, Sutton G.  
597 2008. Aggressive assembly of pyrosequencing reads with mates. *Bioinformatics* 24 (24): 2818-2824.  
598 <http://doi.org/10.1093/bioinformatics/btn548>
- 599 Nakano K, Shiroma A, Shimoji M, Tamotsu H, Ashimine N, Ohki S, Shinzato M, Minami M, Nakanishi T,  
600 Teruya K, *et al.* 2017. Advantages of genome sequencing by long-read sequencer using SMRT  
601 technology in medical area. *Human cell* 30(3): 149-161. <https://doi.org/10.1007/s13577-017-0168-8>

- 602 Nurk S, Walenz BP, Rhie A, Vollger MR, Logsdon GA, Grothe R, Miga KH, Eichler EE, Phillippy AM,  
603 Koren S. 2020. HiCanu: accurate assembly of segmental duplications, satellites, and allelic variants from  
604 high-fidelity long reads. *Genome Research* 30(9):1291-1305. <http://doi.org/10.1101/gr.263566.120>
- 605 Nurk S, Koren S, Rhie A, Rautiainen M, Bzikadze AV, Mikheenko A, Vollger MR, Altemose N, Uralsky L,  
606 Gershman A, *et al.* 2022. The complete sequence of a human genome. *Science* 376(6588):44-53.  
607 <http://doi.org/10.1126/science.abj6987>
- 608 Ouzhuluobu, He Y, Lou H, Cui C, Deng L, Gao Y, Zheng W, Guo Y, Wang X, Ning Z, *et al.* 2020. De novo  
609 assembly of a Tibetan genome and identification of novel structural variants associated with high-altitude  
610 adaptation. *National Science Review* 7(2): 391-402, <https://doi.org/10.1093/nsr/nwz160>
- 611 Porubsky D, Ebert P, Audano PA, Vollger MR, Harvey WT, Marijon P, Ebler J, Munson KM, Sorensen M,  
612 Sulovari A, *et al.* 2021. Fully phased human genome assembly without parental data using single-cell  
613 strand sequencing and long reads. *Nature Biotechnology* 39: 302–308. [https://doi.org/10.1038/s41587-](https://doi.org/10.1038/s41587-020-0719-5)  
614 [020-0719-5](https://doi.org/10.1038/s41587-020-0719-5)
- 615 Ruan J, Li H. 2019. Fast and accurate long-read assembly with wtdbg2. *Nature Methods* 17: 155-158.  
616 <https://doi.org/10.1038/s41592-019-0669-3>
- 617 Song JM, Xie WZ, Wang S, Guo YX, Koo DH, Kudrna D, Gong C, Huang Y, Feng JW, Zhang W, *et al.*  
618 2021. Two gap-free reference genomes and a global view of the centromere architecture in rice.  
619 *Molecular Plant* 14:10 <https://doi.org/10.1016/j.molp.2021.06.018>
- 620 Taylor TL, Volkening JD, DeJesus E, Simmons M, Dimitrov KM, Tillman GE, Suarez DL, Afonso CL.  
621 2019. Rapid, multiplexed, whole genome and plasmid sequencing of foodborne pathogens using long-  
622 read nanopore technology. *Scientific Reports* 9: 16350. <https://doi.org/10.1038/s41598-019-52424-x>
- 623 Tello D, Gil J, Loaiza CD, Riascos JJ, Cardozo N, Duitama J. 2019. NGSEP3: accurate variant calling  
624 across species and sequencing protocols. *Bioinformatics* 35(22): 4716-4723.  
625 <http://doi.org/10.1093/bioinformatics/btz275>
- 626 Wenger AM, Peluso P, Rowell WJ, Chang P-C, Hall RJ, Concepcion GT, Ebler J, Fungtammasan A,  
627 Kolesnikov A, Olson ND, *et al.* 2019. Accurate circular consensus long-read sequencing improves variant

- 628 detection and assembly of a human genome. *Nature Biotechnology* 37: 1155-1162.
- 629 <https://doi.org/10.1038/s41587-019-0217-9>
- 630 Xu G, Bian C, Nie Z, Li J, Wang Y, Xu D, You X, et al. 2020. Genome and population sequencing of a  
631 chromosome-level genome assembly of the Chinese tapertail anchovy (*Coilia nasus*) provides novel  
632 insights into migratory adaptation, *GigaScience* 9(1): giz157. <https://doi.org/10.1093/gigascience/giz157>
- 633 Xu L, Seki M. 2019. Recent advances in the detection of base modifications using the Nanopore  
634 sequencer. *J Hum Genet* 65: 25-33. <https://doi.org/10.1038/s10038-019-0679-0>
- 635 Zhou Y, Xiao S, Lin G, Chen D, Cen W, Xue T, Liu Z, Zhong J, Chen Y, Xiao Y, et al. 2019. Chromosome  
636 genome assembly and annotation of the yellowbelly pufferfish with PacBio and Hi-C sequencing data.  
637 *Scientific Data* 6(1):267. <https://doi.org/10.1038/s41597-019-0279-z>.
